# Supplementary material
Source: Springer Nature journal article supplement (https://www.springermedizin.de/resource/supplementary/12985_2009_750_MOESM2_ESM.pdf/9609206)

chickens

ducks

turkeys

Duodenum  
MAA

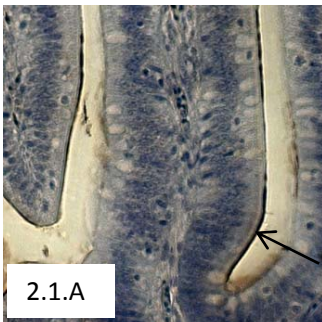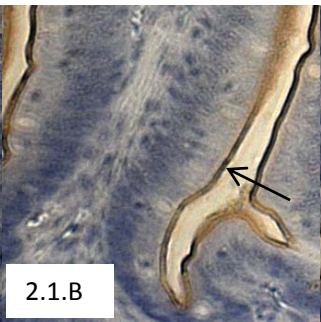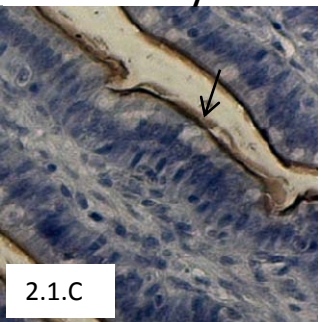

Jejunum  
MAA

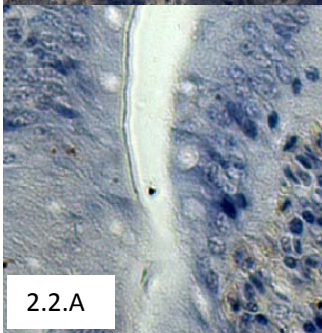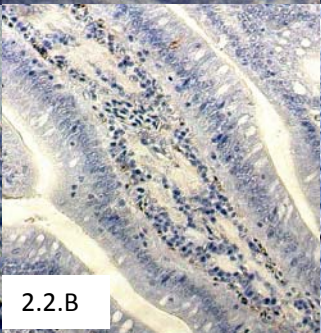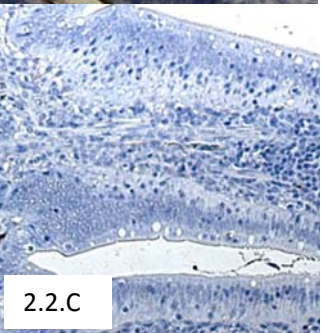

Ileum  
MAA

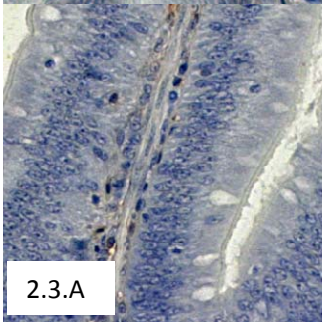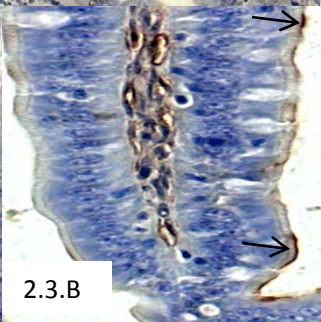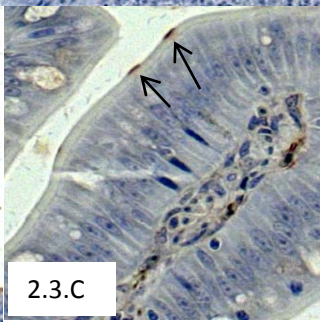

chickens

ducks

turkeys

MAA

SNA

MAA

SNA

MAA

SNA

cecum

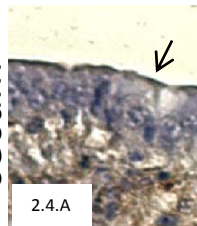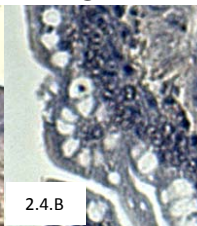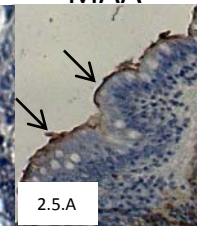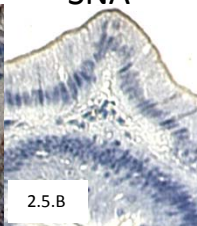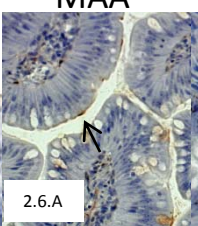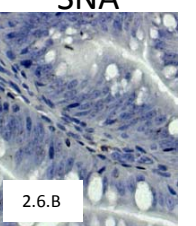

colon

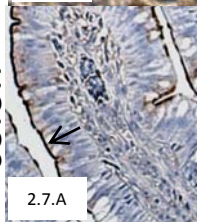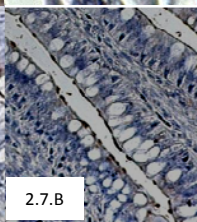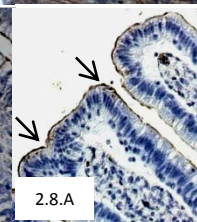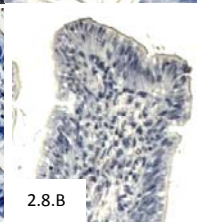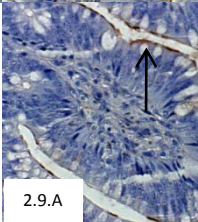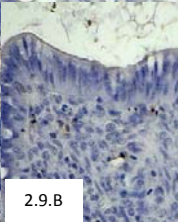

Supplement: MOESM2 [file 9609206]
